# Supplementary material for: Vitamin D Deficiency and its Risk Factors among Adults in Sharg El-Nile Locality 2022-2023: A cross-sectional study at Primary Health care Centers
Source: Research Square preprint supplement (doi:10.21203/rs.3.rs-7547116/v1), 2025-11-11
Supplement: Supplementary file 1 [file 448c6753239b0737e5ffdf28.docx]

**Vitamin D deficiency and it is risk factors among adult at primary health centers in in Sharg El-Nile Locality 2022-2023**

**The Questionnaire**

Serial NO ……….

**1-Age years**

**22-39**  **40-59**  **>60**

**2-Gender**

Male  Female

**3-BMI**

Underweight  Normal  overweight  Obese

**4-Educational level**

Did not finish high school  finish high school  Any college education

**5-How would you rate your health?**

Very good  Good  Fair  Poor  Very Poor

**6-Which products containing vitamin D do eat you regularly? (Twice or often per week)**

Milk  Fish  Cheese  Eggs  None.

**7-On average, how much sun exposure have you had in the post week?**

Less than 15 minutes per day.  15 – 30 minutes per day.

More 30minutes per day.

**8-Exercise**

Daily or almost daily  Weekly  Rarely or none

**9- Smokers**

Never smoked Former smoker Current smoker.

**10-Vitamin D level (25-OH-D3) : ……………….. Ng/ml**

**Classification:**

**Deficient insufficient sufficient**

**12-Have you been diagnosed with?**

-Hypertension  -Diabetes  -Cancer

-Other  -Gout

-Coronary heart disease  Congestive heart failure
